# Supplementary material for: A Comprehensive Analysis of the Structural Recognition between KCTD Proteins and Cullin 3
Source: MDPI journal article supplement (doi:10.3390/ijms25031881), 2024-02-04
Supplement: s1 [file s1]

**Supplementary material for:**

**A comprehensive analysis of the structural recognition  
between KCTD proteins and Cullin 3**

**Nicole Balasco <sup>1,\*†</sup>, Luciana Esposito <sup>2,†</sup>, Giovanni Smaldone <sup>3</sup>, Marco Salvatore <sup>3</sup> and Luigi Vitagliano <sup>2,#</sup>**

<sup>1</sup>Institute of Molecular Biology and Pathology, CNR c/o Department Chemistry, Sapienza University of Rome, 00185 Rome, Italy

<sup>2</sup>Institute of Biostructures and Bioimaging, CNR, 80131 Naples, Italy

<sup>3</sup>IRCCS SYNLAB SDN, 80143 Naples, Italy

<sup>†</sup> These authors contributed equally to this work.

\* Correspondence: nicole.balasco@cnr.it (N.B.); luigi.vitagliano@cnr.it (L.V.)

**Table S1.** Detection of KCTD-Cul3 binders from the BioGRID database (<https://thebiogrid.org/> accessed on December 2022 and 2023).

| Large scale studies                                                                                                       |                                                                                |
|---------------------------------------------------------------------------------------------------------------------------|--------------------------------------------------------------------------------|
| Detected protein                                                                                                          | Reference                                                                      |
| KCTD12, KCTD21, KCTD6, KCTD2, KCTD5, KCTD17, KCTD18, BTBD10, KCTD20, KCTD7, KCTD10, KCTD13, TNFAIP1, KCTD3, SHKBP1, KCTD9 | Bennett et al. [1]                                                             |
| KCTD6, KCTD2, BTBD10, KCTD20, KCTD10, KCTD13, TNFAIP1, KCTD3, KCTD9                                                       | Huttlin et al. [2]                                                             |
| KCTD6, KCTD2, KCTD5, KCTD17, KCTD18, BTBD10, KCTD20, KCTD10, KCTD13, TNFAIP1, KCTD3, SHKBP1, KCTD9                        | Kouranti et al. [3]                                                            |
| KCTD6, KCTD17, BTBD10, KCTD20, KCTD10, KCTD13, TNFAIP1, KCTD3, KCTD9                                                      | Huttlin et al. [4]                                                             |
| KCTD6, KCTD7, KCTD10, KCTD13, SHKBP1, KCTD9                                                                               | Luck et al. [5]                                                                |
| KCTD2, KCTD5, KCTD17, BTBD10, KCTD20, KCTD10, KCTD13, KCTD3, KCTD9                                                        | Chatrathi et al. [6]                                                           |
| KCTD5, KCTD17, KCTD10, KCTD13, SHKBP1                                                                                     | Pinkas et al. [7]                                                              |
| KCTD6, KCTD5, KCTD17, KCTD9                                                                                               | Ji et al. [8]                                                                  |
| KCTD6, KCTD13, TNFAIP1, KCTD9                                                                                             | Rolland et al. [9]                                                             |
| KCTD5, KCTD17, TNFAIP1, KCTD9                                                                                             | Kato et al. [10]                                                               |
| KCTD2, KCTD5, KCTD17                                                                                                      | Young et al. [11]                                                              |
| Specific studies                                                                                                          |                                                                                |
| KCTD6                                                                                                                     | Heride et al. [12]<br>Smaldone et al. [13]<br>Lange et al. [14]                |
| KCTD2                                                                                                                     | Kim et al. [15]                                                                |
| KCTD5                                                                                                                     | Balasco et al. [16]<br>Bayón et al. [17]<br>Cho et al. [18]                    |
| KCTD17                                                                                                                    | Kasahara et al. [19]                                                           |
| KCTD7                                                                                                                     | Wang et al. [20]<br>Staropoli et al. [21]<br>Metz et al. [22]                  |
| BTBD10, SHKBP1                                                                                                            | Wang et al. [23]                                                               |
| KCTD10                                                                                                                    | Olma et al. [24]<br>Ren et al. [25]<br>Dubiel et al. [26]<br>Nagai et al. [27] |
| KCTD13, TNFAIP1                                                                                                           | Chen et al. [28]                                                               |
| KCTD13                                                                                                                    | Ibeawuchi et al. [29]                                                          |
| TNFAIP1                                                                                                                   | Hu et al. [30]                                                                 |

**Table S2.** Interactions detected at one of the five equivalent interfaces involving two KCTD chains (chain A as main and chain F as minor) and a single Cul3 (chain E) detected in the predicted KCTD7-Cul3 complex.

| KCTD7                                     | Cul3     |
|-------------------------------------------|----------|
| Chain A                                   | Chain E  |
| <b>H-bonding/salt-bridge interactions</b> |          |
| D74_O                                     | R128_NH2 |
| H85_NE2                                   | D121_OD2 |
| D98_OD1                                   | R59_NH2  |
| Y131_O                                    | Y58_OH   |
| Y131_OH                                   | E55_OE2  |
| A133_O                                    | R128_NE  |
| <b>Hydrophobic interactions</b>           |          |
| M76, M80, H85                             | F54      |
| M76, Y131                                 | Y58      |
| Y131                                      | Y62      |
| Chain F                                   | Chain E  |
| <b>H-bonding/salt-bridge interactions</b> |          |
| R65_NH2                                   | E55_OE1  |
| R65_NH2                                   | S53_OG   |
| S67_OG                                    | E56_OE2  |

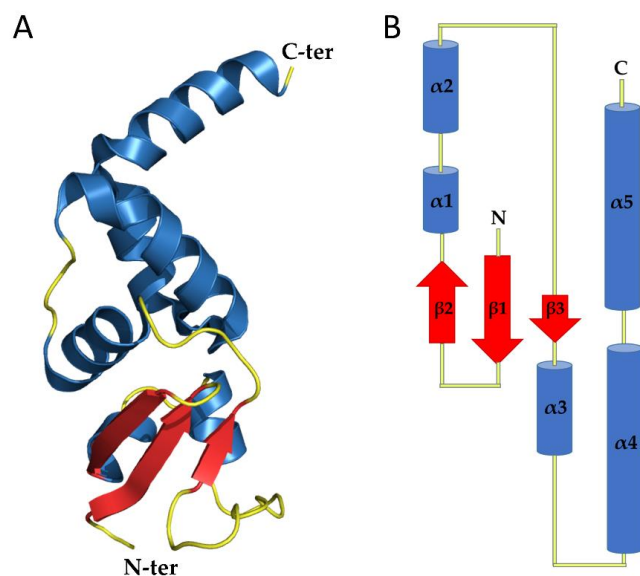

**Figure S1.** Cartoon representation (A) and topology (B) of the BTB architecture ( $\beta 1\beta 2\alpha 1\alpha 2\beta 3\alpha 3\alpha 4\alpha 5$ ). As representative example, the BTB domain of KCTD7 (PDB ID: 8i79) is shown.

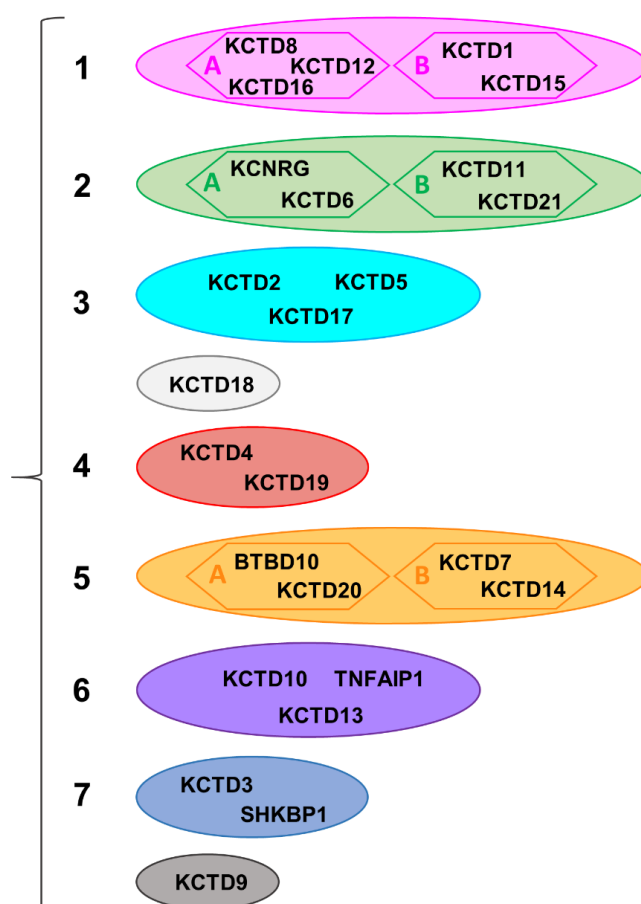

**Figure S2.** Schematic representation of the structure-based clusters of KCTD proteins derived from Esposito et al. [32,33].

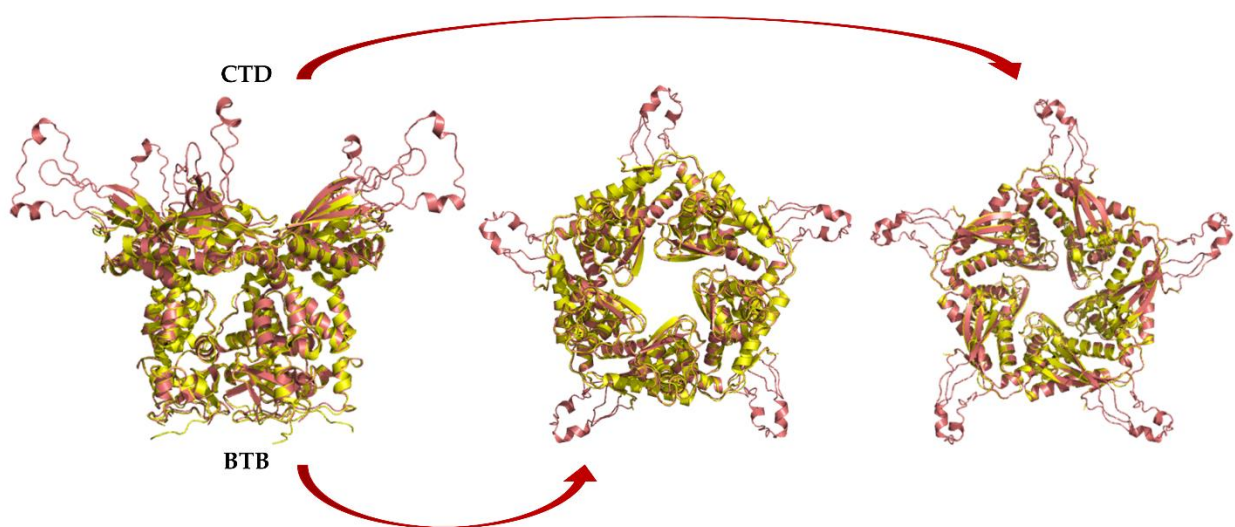

**Figure S3.** Structural superimposition of the experimental (extracted from the KCTD7-Cul3 complex - PDB ID: 8i79, yellow) [31] and predicted (pink) [32] KCTD7<sup>FL</sup> structures.

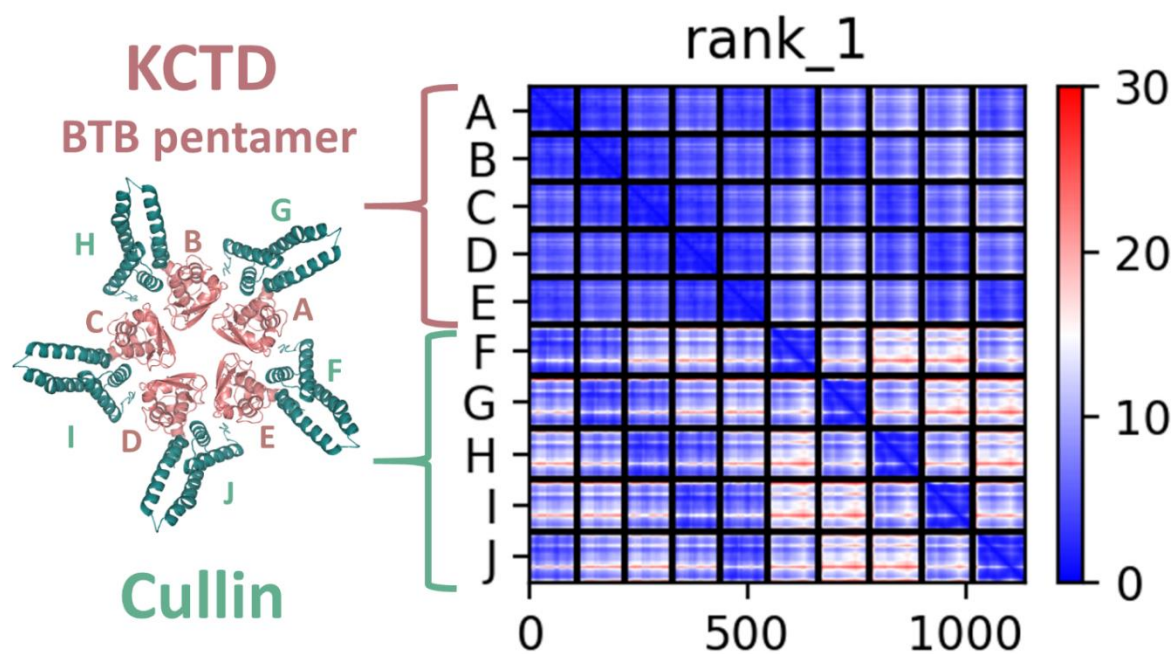

**Figure S4.** PAE matrix of AF complex between KCTD7 (BTB domain) and Cul3 (residues 17-134). Only the best AF prediction (rank 1) is shown.

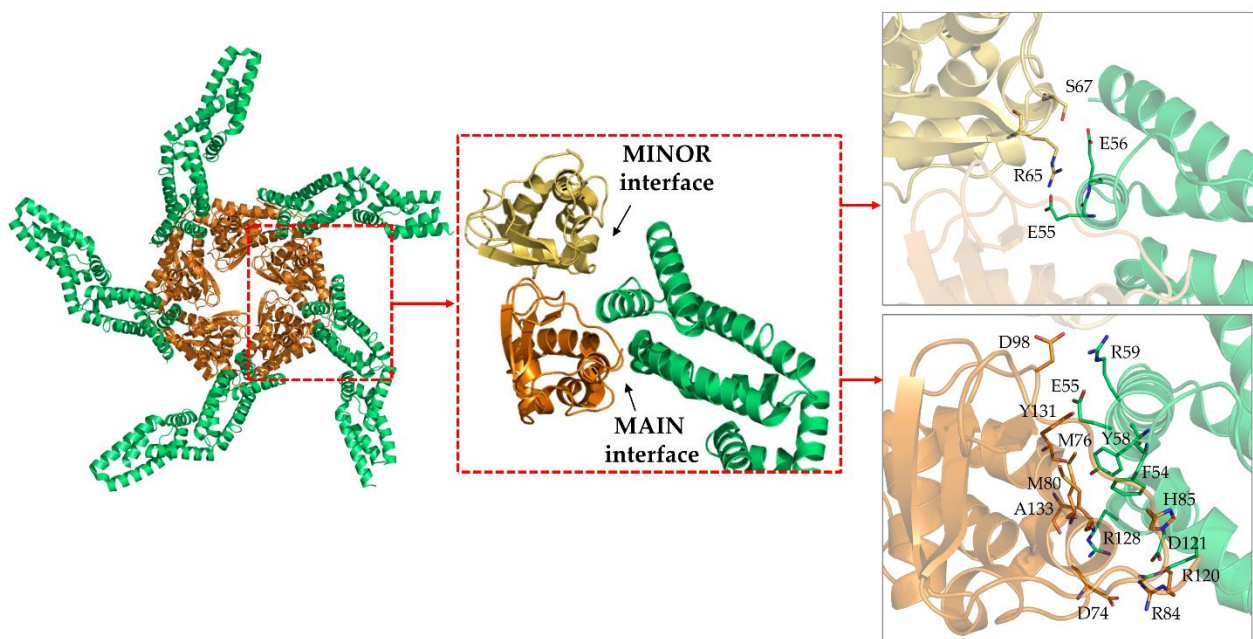

**Figure S5.** Cartoon representation of the experimental 5:5 complex between KCTD7<sup>FL</sup> (orange) and Cul3 (green) [31]. A snapshot on one of the five equivalent interfaces involving two KCTD chains (main in orange and minor in yellow) and a single Cul3 is shown and the amino acid residues involved in the interactions at the main/minor interfaces are shown.

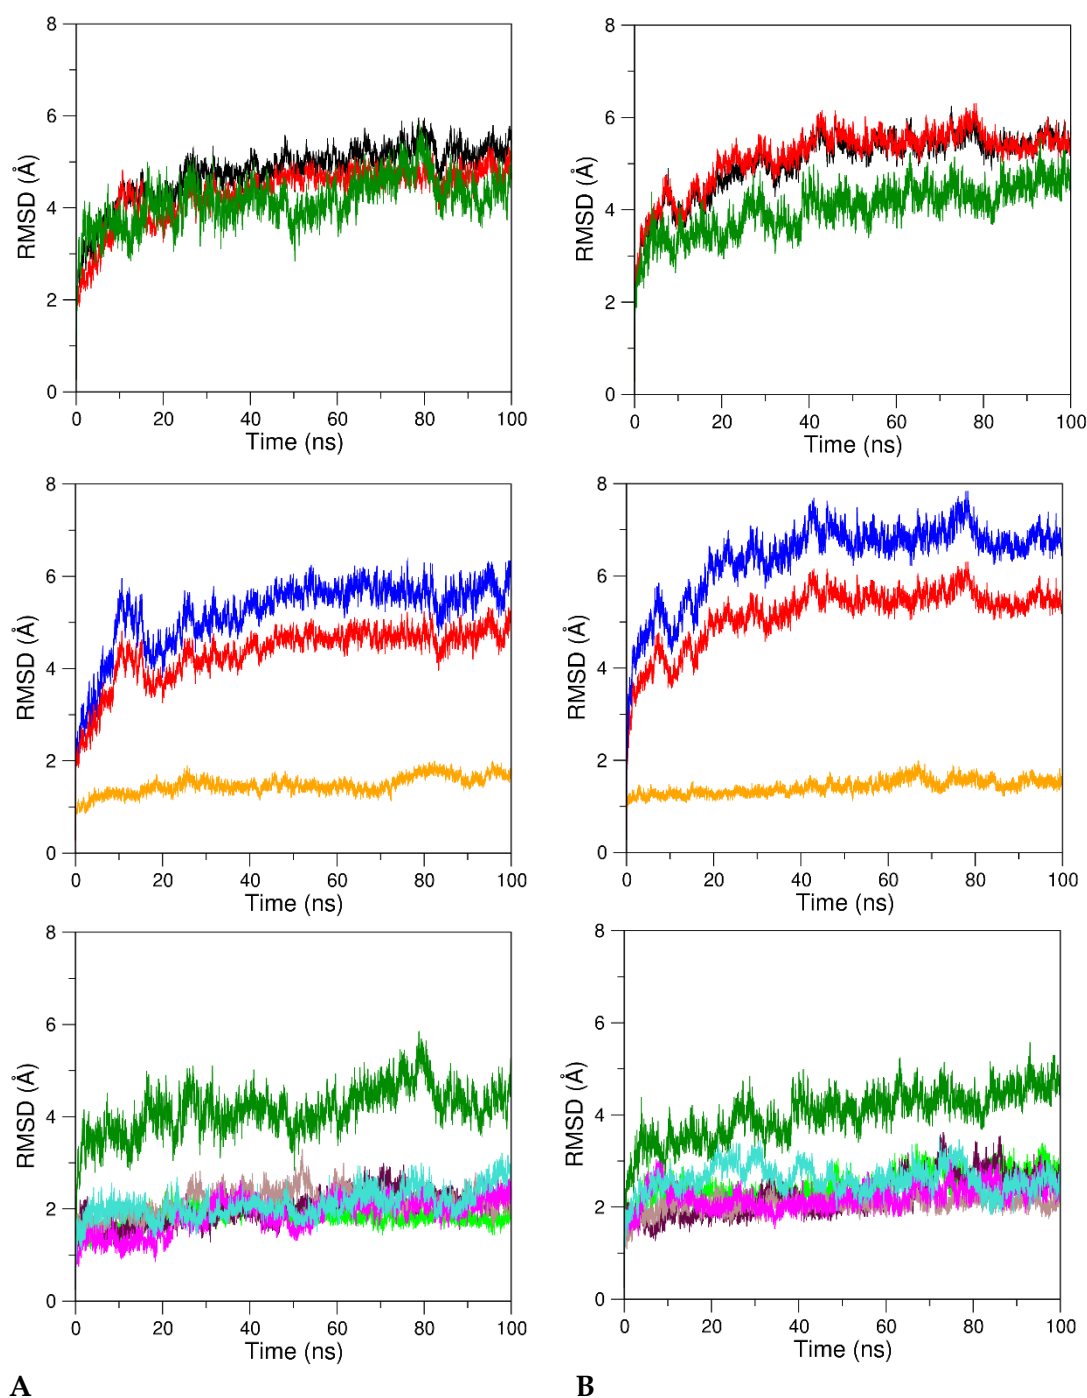

**Figure S6.**  $C^\alpha$  RMSD values of trajectory structures against the starting model calculated on the whole KCTD7<sup>FL</sup>-Cul3 complex (black), on KCTD7 pentamer (FL in red, BTB in orange and CTD in blue), and Cul3 chains (all chains together in green, the five individual chains in magenta, light green, grey, cyan and violet) in the MD simulations of the predicted (A) and experimental (B, PDB ID: 8i79) KCTD7-Cul3 complex.

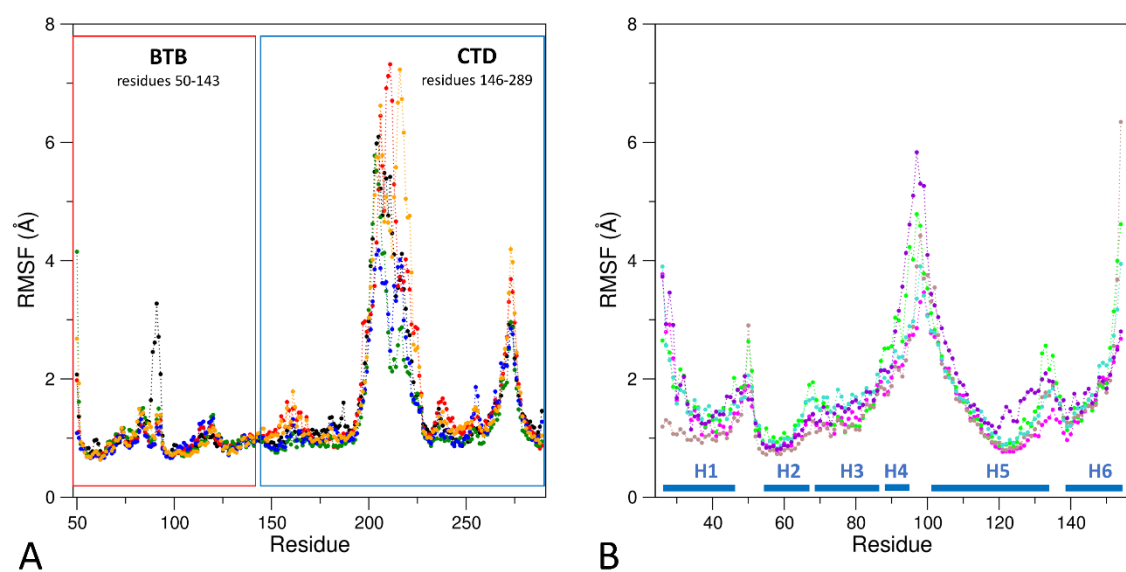

**Figure S7.** RMSF (Root mean square fluctuation) values computed on the C $^{\alpha}$  atoms of residues of KCTD7 (A) and Cul3 (B) in the equilibrated region (50-100 ns) of the trajectory in the MD simulation of the predicted KCTD7-Cul3 complex.



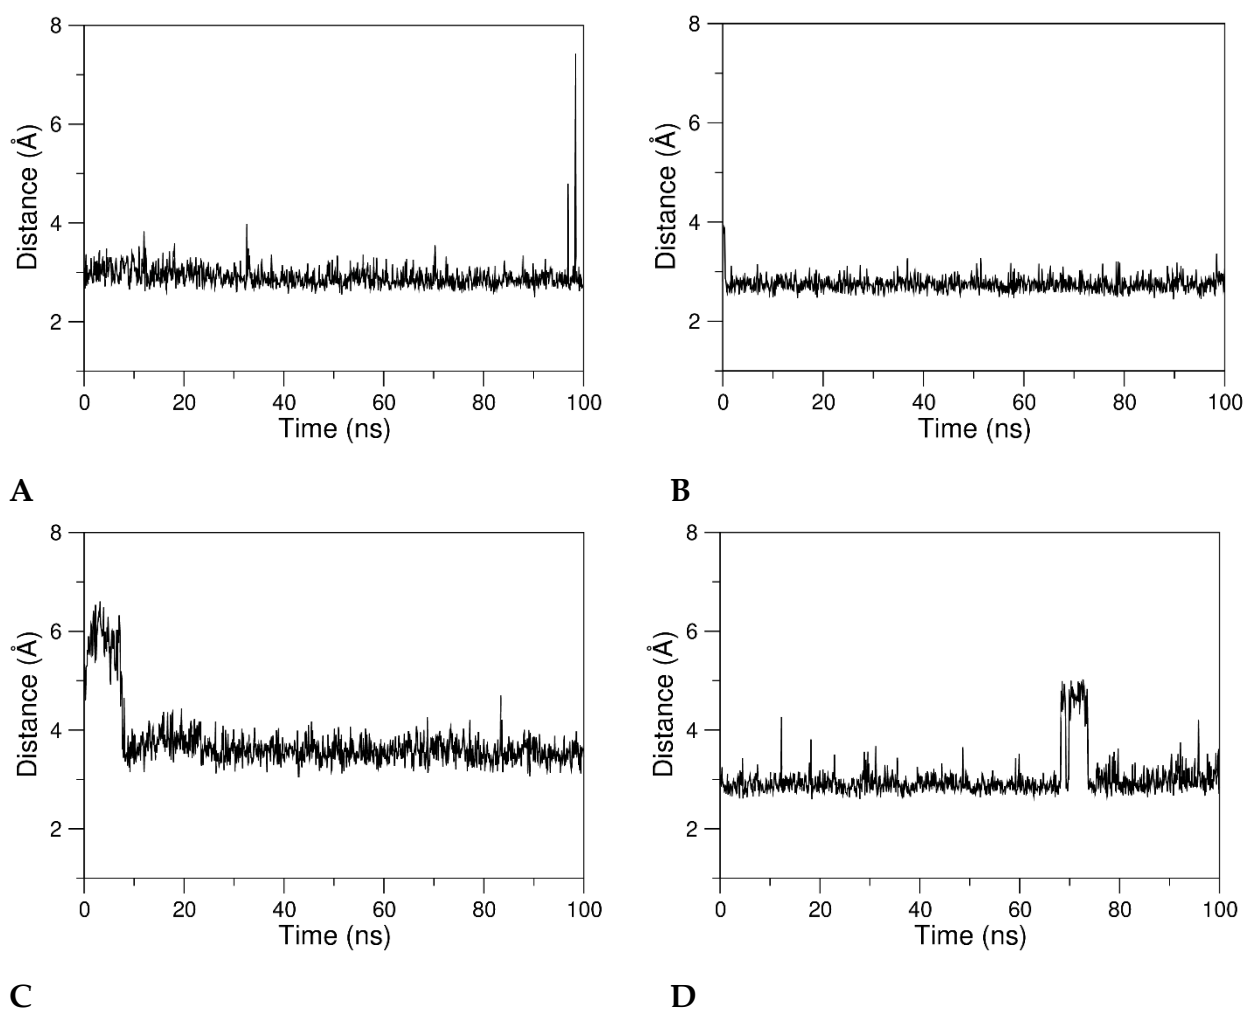

**Figure S8.** Evolution of the distances between pairs of KCTD7-Cul3 atoms involved in salt bridge (R84\_NH2-D121\_OD2 (A)), H-bonding (Y131\_O-Y58\_OH (B)), and hydrophobic (H85\_CG-F54\_CD2 (C)) interactions at the main interface and a salt bridge interaction at the minor interface (R65\_NE-E55\_OE1 (D)) in the MD simulation of the experimental KCTD7<sup>FL</sup>-Cul3 complex (PDB ID: 8i79).

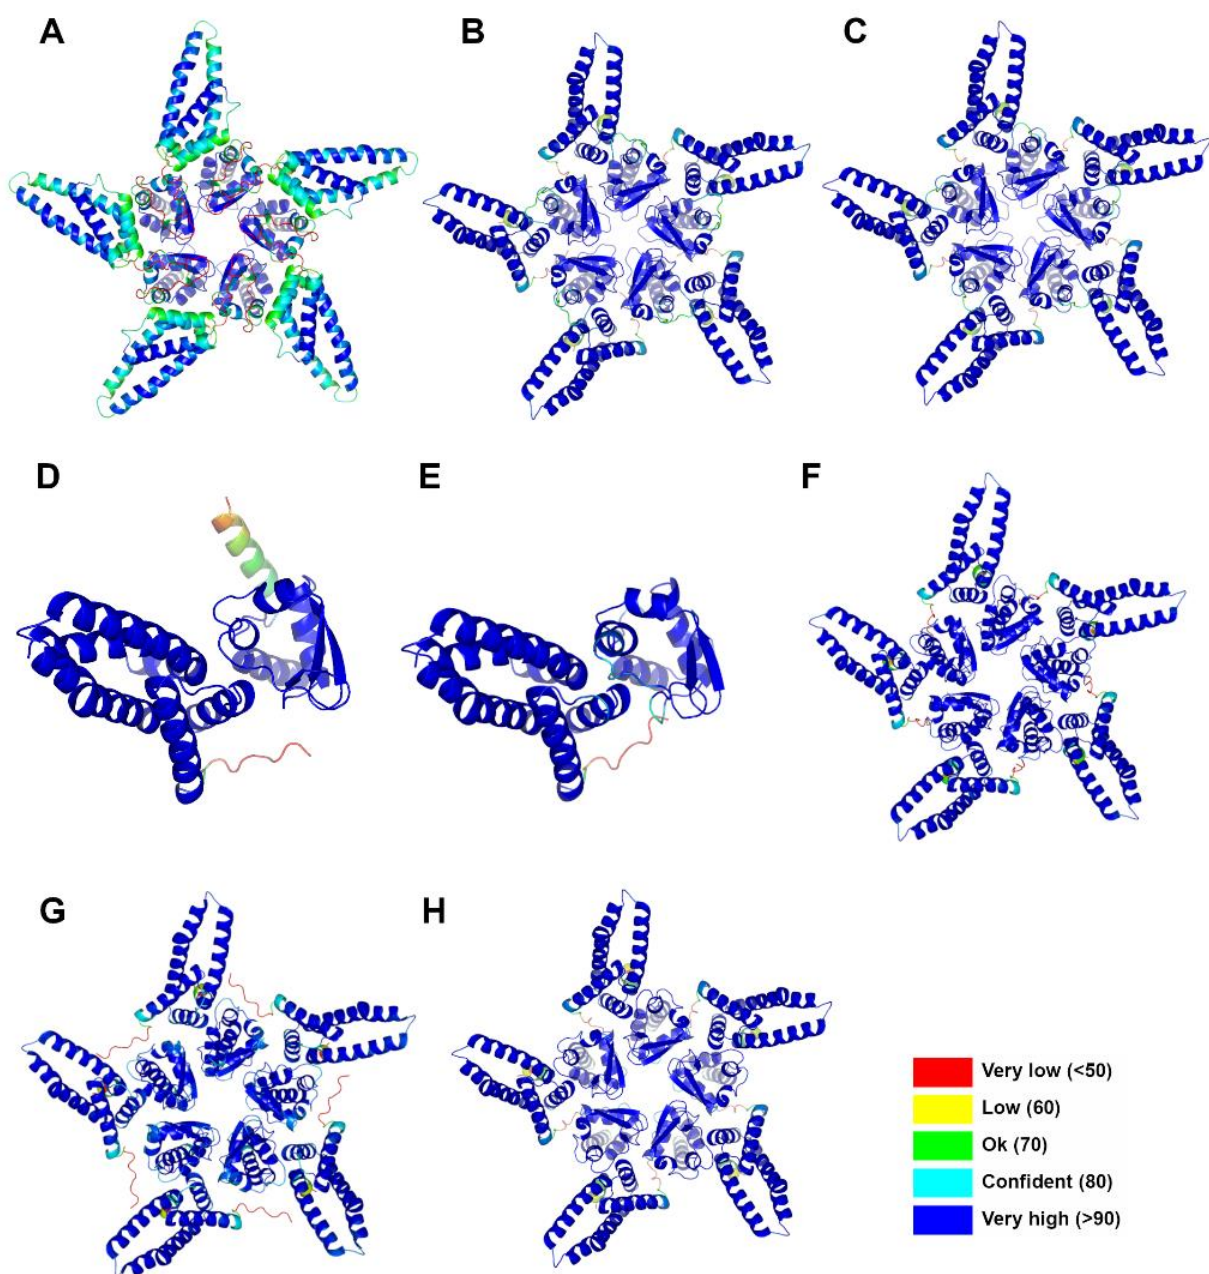

**Figure S9.** Ribbon representation of AF complexes of selected members of KCTDs (BTB domains) with Cullin3 (residues 17-134). (A) KCTD11 (cluster 2B); (B) KCTD2 (cluster 3); (C) KCTD17 (cluster 3); (D) KCTD18; (E) KCTD20 (cluster 5A); (F) KCTD10 (cluster 6); (G) TNFAIP1 (cluster 6); (H) SHKBP1 (cluster 7). Structural models are colored following AF per-residue confidence metric (pLDDT).

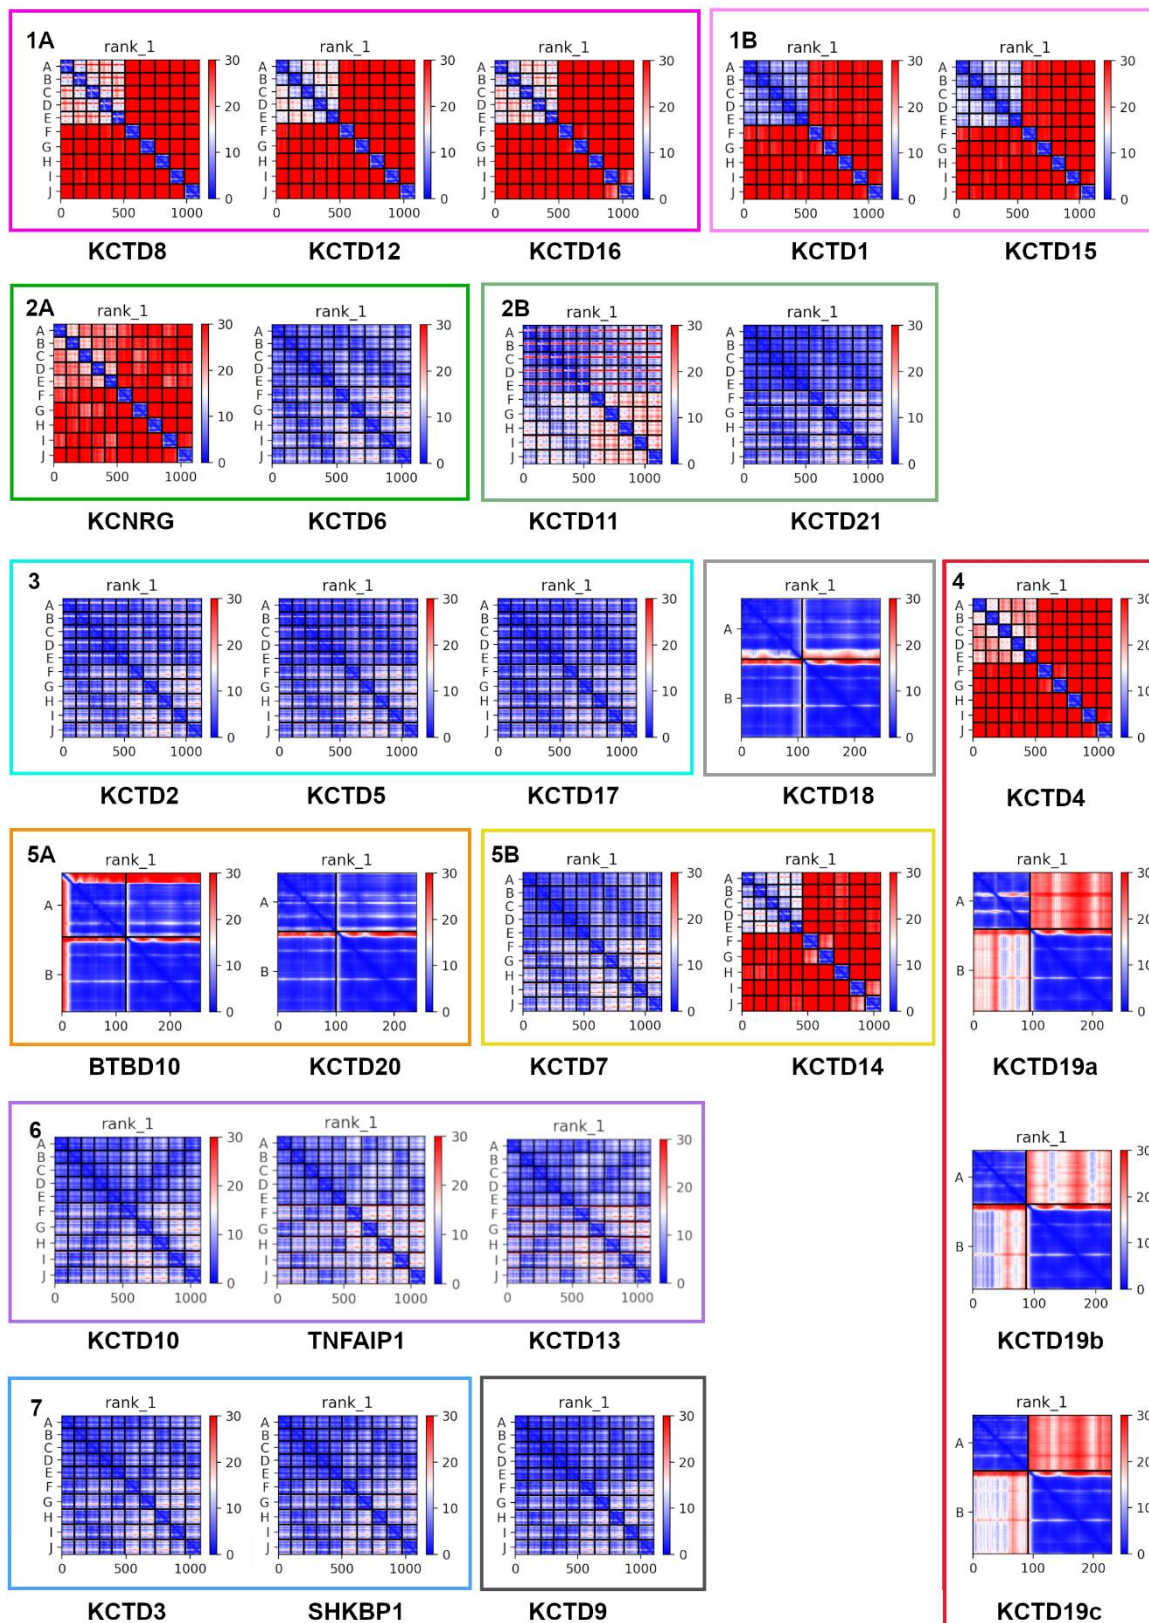

**Figure S10.** PAE matrices of AF complexes between KCTDs (BTB domains) and Cul3. BTB domains of KCTD proteins assume pentameric states (chains A-E) except for KCTD18, BTBD10, KCTD20, KCTD19 that assume a monomeric state (chain A). Only the best AF prediction (rank 1) is shown.

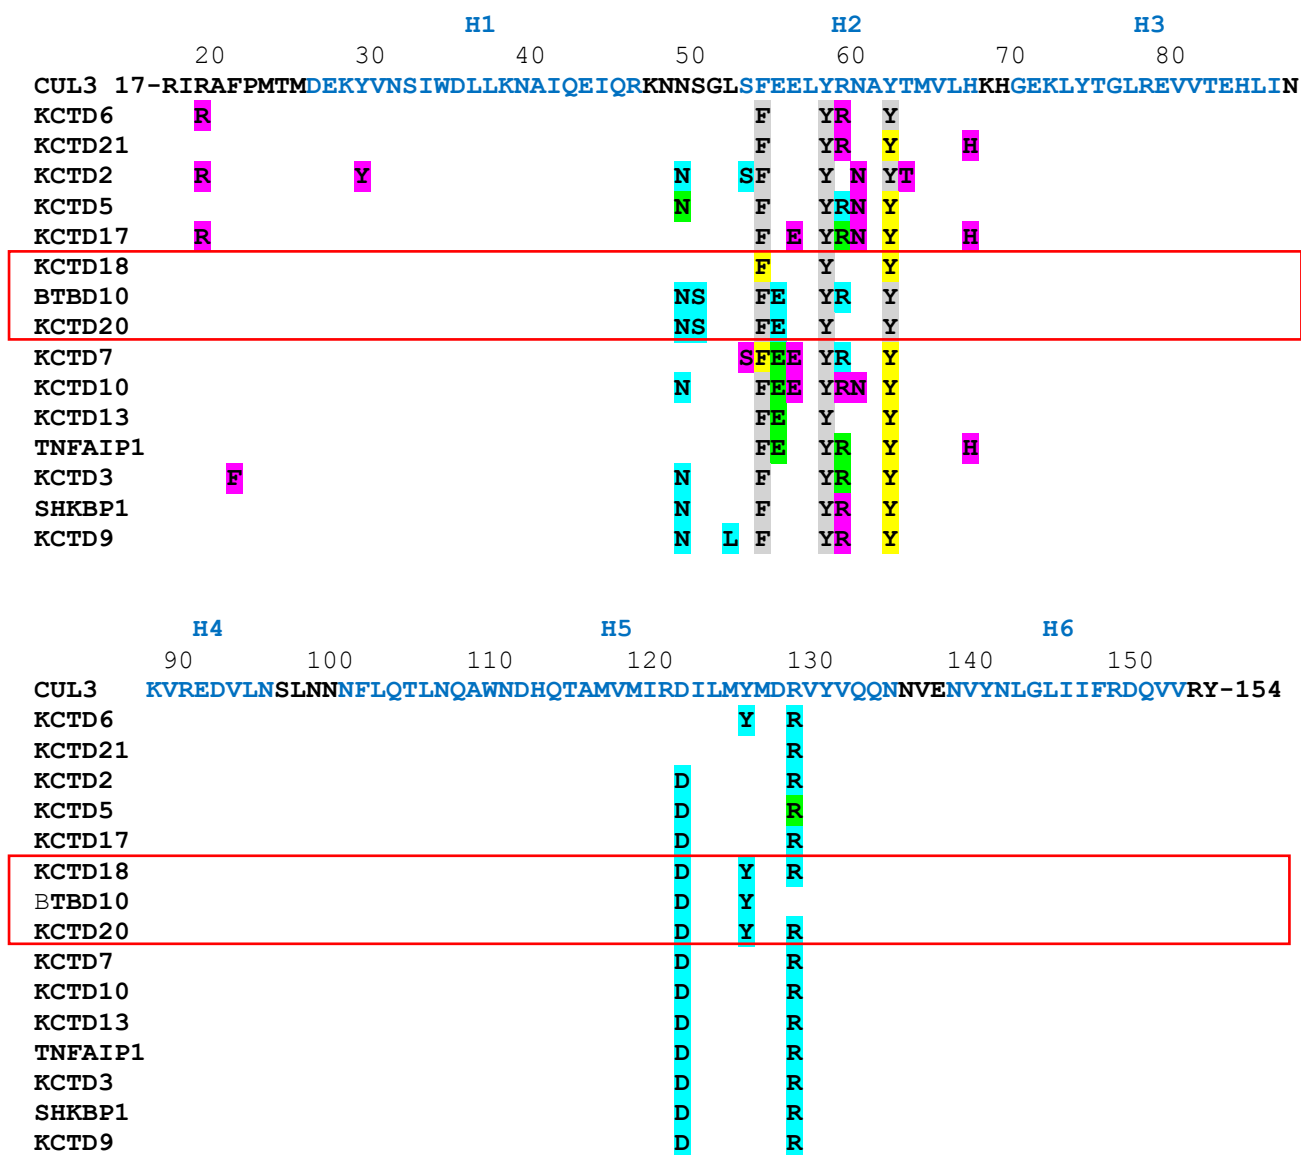

**Figure S11.** Residues of Cul3 involved in interactions with the BTB domain of KCTD proteins at the main (cyan for H-bonds, yellow for hydrophobic interactions, grey for both types of contacts), minor (magenta for H-bonds) and both (green for H-bonds) interfaces. Residues belonging to the six  $\alpha$ -helices (H1-H6) are in blue.

| Protein       | $\alpha 2$ - $\beta 3$ region |                            |
|---------------|-------------------------------|----------------------------|
|               | Residues                      | Sequence                   |
| <b>KCTD8</b>  | S32-R53                       | SPSSPRGGARRRGELPRDSRAR     |
| <b>KCTD12</b> | Q34-R47                       | QQQ <b>PQE</b> LARDSKGR    |
| <b>KCTD16</b> | S32-R48                       | SPKRDT <b>AND</b> LAKDSKGR |
| <b>KCTD1</b>  | G33-Q44                       | GTEPIVLDSLKQ               |
| <b>KCTD15</b> | G33-Q44                       | GTEPIVLDSLKQ               |
| <b>KCNRG</b>  | L31-G43                       | LDGRDQE <b>FKMV</b> GG     |
| <b>KCTD4</b>  | N32-H44                       | NGKILCPFDADGH              |
| <b>KCTD14</b> | S33-R44                       | S <b>LAK</b> ASTDAEGR      |

**Figure S12.** Sequence of the  $\alpha 2$ - $\beta 3$  loop of KCTD proteins that do not form stable complexes with Cul3. Residues in 3(10)-helices and strands are highlighted in blue and red, respectively.



| KCTD  | 1   | 2    | 3    | 4    | 5    | 6    | 7    | 8    | 9    | 10   | 11   | 12   | 13   | 14   | 15   | 16   | 17   | 18   | 19a  | 19b  | 19c  | 20   | 21   | TNF  | SHK  | KCN  | BTB10 |
|-------|-----|------|------|------|------|------|------|------|------|------|------|------|------|------|------|------|------|------|------|------|------|------|------|------|------|------|-------|
| 1     |     | 33.7 | 33.7 | 41.4 | 31.5 | 53.8 | 37.2 | 35.4 | 30.2 | 33.7 | 43.2 | 40.2 | 29.4 | 31.9 | 82.5 | 39.4 | 34.4 | 34.5 | 33   | 38.5 | 39.1 | 26   | 50.5 | 28.7 | 37.6 | 37.8 | 27.1  |
| 2     | 104 |      | 47.3 | 36.7 | 79.4 | 36.1 | 35.2 | 32.4 | 47.1 | 33.3 | 39.8 | 38.7 | 35.1 | 40.6 | 35.2 | 37.5 | 72.1 | 35.6 | 34.8 | 32   | 31.9 | 29.9 | 34.7 | 31.1 | 48   | 37.9 | 26.9  |
| 3     | 92  | 91   |      | 42.2 | 45.6 | 46.7 | 38.6 | 36.0 | 40.2 | 38.6 | 45.7 | 36.6 | 32.3 | 38.2 | 37.8 | 34.7 | 52.8 | 34.9 | 32.2 | 28.6 | 32.8 | 28.6 | 47.8 | 39.8 | 82.5 | 41.4 | 25.0  |
| 4     | 99  | 98   | 90   |      | 38.1 | 53.3 | 38.9 | 39.4 | 35.4 | 43.6 | 47.4 | 37.9 | 40.9 | 37.5 | 45.4 | 40.0 | 39.0 | 33.3 | 30.4 | 38.9 | 38.5 | 28.4 | 48.4 | 36.2 | 41.8 | 38.5 | 21.6  |
| 5     | 105 | 107  | 90   | 97   |      | 40.6 | 34.7 | 32.4 | 47.5 | 33.3 | 37.8 | 33.7 | 36.2 | 41.1 | 31.5 | 37.5 | 76.7 | 39.1 | 33.8 | 30   | 30   | 29.9 | 35.1 | 31.1 | 41.3 | 33.7 | 23.9  |
| 6     | 91  | 97   | 90   | 90   | 96   |      | 45.9 | 43.1 | 38.9 | 42.2 | 60.6 | 44   | 43.3 | 37.4 | 56.7 | 43.8 | 43.2 | 44.8 | 33.7 | 34.8 | 34.8 | 32.4 | 71.9 | 44.9 | 44.6 | 43   | 27.8  |
| 7     | 94  | 91   | 88   | 95   | 95   | 98   |      | 38.8 | 38.9 | 47.3 | 43   | 34.4 | 46.7 | 48.4 | 38.3 | 45.5 | 38.3 | 41.9 | 29   | 34.8 | 28.7 | 33.3 | 45.2 | 42.7 | 40.9 | 37.6 | 27.5  |
| 8     | 99  | 105  | 100  | 109  | 108  | 102  | 103  |      | 35.3 | 40.6 | 39.6 | 62.4 | 36.6 | 43.1 | 36.7 | 67.3 | 29.6 | 39.4 | 33.3 | 28.2 | 27.3 | 27.2 | 45.2 | 35.3 | 36.9 | 41   | 26.6  |
| 9     | 96  | 102  | 92   | 96   | 99   | 95   | 95   | 102  |      | 35.6 | 38.1 | 36.8 | 40   | 43.2 | 31.9 | 38.1 | 47.3 | 41.4 | 28   | 31.9 | 27.4 | 26.9 | 41.7 | 31.7 | 38.5 | 35.7 | 26.6  |
| 10    | 92  | 105  | 88   | 94   | 105  | 90   | 93   | 101  | 101  |      | 43.6 | 38.4 | 79   | 42.2 | 33   | 39.6 | 37.9 | 39.8 | 32.2 | 33.7 | 33.7 | 31.5 | 50.5 | 78   | 37.9 | 32.6 | 30.1  |
| 11    | 95  | 98   | 94   | 97   | 98   | 99   | 100  | 101  | 97   | 94   |      | 39.6 | 42.6 | 37.4 | 40   | 38.8 | 40.8 | 38.2 | 34.7 | 37.5 | 37.5 | 29.7 | 63.4 | 43.6 | 42.3 | 41.7 | 28.9  |
| 12    | 92  | 93   | 93   | 95   | 92   | 100  | 96   | 101  | 95   | 99   | 96   |      | 36.3 | 42.1 | 41.7 | 68.4 | 38   | 42.2 | 35.3 | 34.4 | 30.9 | 28.8 | 45.8 | 37.4 | 34.4 | 47.3 | 27.4  |
| 13    | 102 | 94   | 99   | 93   | 94   | 90   | 92   | 101  | 100  | 100  | 94   | 91   |      | 42.2 | 29.9 | 37.5 | 36.8 | 39.8 | 27.5 | 33.7 | 33   | 30.1 | 49.5 | 67   | 33.7 | 31.4 | 32.7  |
| 14    | 94  | 96   | 89   | 80   | 95   | 99   | 93   | 102  | 95   | 90   | 99   | 95   | 90   |      | 32.6 | 47.4 | 39.4 | 42.6 | 27.8 | 30.8 | 28.7 | 26.1 | 41.5 | 37.1 | 39.1 | 41.9 | 35.9  |
| 15    | 103 | 91   | 90   | 97   | 89   | 90   | 94   | 98   | 94   | 97   | 100  | 96   | 97   | 95   |      | 37.6 | 34   | 34.6 | 34.7 | 34.8 | 33.3 | 27.5 | 51   | 28.9 | 42.9 | 37.9 | 23.7  |
| 16    | 94  | 96   | 95   | 95   | 96   | 96   | 66   | 110  | 97   | 96   | 103  | 98   | 96   | 97   | 93   |      | 33.3 | 40.2 | 32.7 | 28   | 44.4 | 29.9 | 46.1 | 36.1 | 36.7 | 45   | 27.6  |
| 17    | 90  | 104  | 89   | 100  | 103  | 95   | 94   | 108  | 91   | 103  | 98   | 92   | 106  | 94   | 97   | 96   |      | 37.2 | 25.5 | 34   | 30.2 | 29.9 | 39.4 | 33.3 | 47.4 | 33   | 26.9  |
| 18    | 84  | 87   | 83   | 84   | 87   | 87   | 86   | 94   | 87   | 83   | 89   | 90   | 83   | 68   | 81   | 92   | 86   |      | 37.1 | 20   | 30.2 | 23.5 | 44.8 | 40   | 34.9 | 36.5 | 29.9  |
| 19a   | 97  | 66   | 90   | 79   | 65   | 98   | 100  | 63   | 93   | 59   | 101  | 68   | 80   | 97   | 95   | 98   | 98   | 62   |      | 27.2 | 27.2 | 33.3 | 37.2 | 27.3 | 33.3 | 28.4 | 28.6  |
| 19b   | 52  | 50   | 63   | 90   | 90   | 92   | 23   | 39   | 47   | 89   | 96   | 64   | 89   | 65   | 89   | 75   | 50   | 35   | 81   |      | 34.6 | 29.2 | 36.1 | 28.7 | 33.8 | 28   | 33.3  |
| 19c   | 92  | 91   | 67   | 91   | 90   | 92   | 94   | 99   | 95   | 89   | 96   | 97   | 91   | 94   | 93   | 45   | 53   | 53   | 81   | 81   |      | 24.9 | 35.8 | 28.1 | 32.8 | 27.4 | 31    |
| 20    | 73  | 67   | 91   | 74   | 67   | 74   | 69   | 81   | 78   | 73   | 74   | 73   | 73   | 69   | 69   | 76   | 67   | 95   | 21   | 24   | 17   |      | 28   | 31.9 | 29.9 | 26.9 | 77    |
| 21    | 95  | 98   | 90   | 95   | 97   | 96   | 93   | 104  | 96   | 93   | 101  | 96   | 93   | 94   | 96   | 102  | 99   | 87   | 94   | 97   | 95   | 75   |      | 46   | 50   | 44.6 | 27.6  |
| TNF   | 101 | 106  | 88   | 94   | 103  | 89   | 96   | 102  | 101  | 100  | 94   | 91   | 103  | 97   | 97   | 97   | 102  | 85   | 66   | 87   | 89   | 72   | 100  |      | 35.8 | 31.2 | 28.9  |
| SHK   | 101 | 102  | 97   | 98   | 104  | 92   | 93   | 103  | 96   | 95   | 97   | 96   | 104  | 92   | 91   | 98   | 97   | 86   | 93   | 65   | 67   | 77   | 96   | 95   |      | 42.9 | 27.9  |
| KCN   | 90  | 95   | 87   | 91   | 95   | 93   | 101  | 105  | 98   | 92   | 96   | 93   | 102  | 93   | 87   | 100  | 97   | 85   | 95   | 93   | 95   | 78   | 82   | 93   | 91   |      | 29.5  |
| BTB10 | 59  | 67   | 92   | 74   | 71   | 90   | 69   | 94   | 79   | 73   | 90   | 73   | 52   | 64   | 59   | 76   | 67   | 97   | 21   | 27   | 29   | 100  | 87   | 76   | 68   | 78   |       |

**Figure S13.** Pairwise sequence identity between all BTB domains of KCTD proteins. For each pair, the percentage of identical residues and the number of aligned residues are reported above and below the diagonal. The color code present in the vertical and orizontal bars discriminate between Cul3-binders (green) and non-binders (red). In the protein naming the KCTD acronym has been omitted. TNF, SHK, KCN, BTB10 are the abbreviations for TNFAIP1, SHKBP1, KCNKG, BTBD10, respectively. The green box reports the sequence identity of BTB domains belonging to KCTDs whose CTD domains are aligned by BLAST.

## References

1. Bennett, E.J.; Rush, J.; Gygi, S.P.; Harper, J.W. Dynamics of Cullin-RING Ubiquitin Ligase Network Revealed by Systematic Quantitative Proteomics. *Cell* **2010**, *143*, 951–965, doi:10.1016/j.cell.2010.11.017.
2. Huttlin, E.L.; Bruckner, R.J.; Paulo, J.A.; Cannon, J.R.; Ting, L.; Baltier, K.; Colby, G.; Gebreab, F.; Gygi, M.P.; Parzen, H.; et al. Architecture of the Human Interactome Defines Protein Communities and Disease Networks. *Nature* **2017**, *545*, 505–509, doi:10.1038/nature22366.
3. Kouranti, I.; Abdel Khalek, W.; Mazurkiewicz, S.; Loisel-Ferreira, I.; Gautreau, A.M.; Pintard, L.; Jeunemaitre, X.; Clauser, E. Cullin 3 Exon 9 Deletion in Familial Hyperkalemic Hypertension Impairs Cullin3-Ring-E3 Ligase (CRL3) Dynamic Regulation and Cycling. *Int. J. Mol. Sci.* **2022**, *23*, 5151, doi:10.3390/ijms23095151.
4. Huttlin, E.L.; Bruckner, R.J.; Navarrete-Perea, J.; Cannon, J.R.; Baltier, K.; Gebreab, F.; Gygi, M.P.; Thornock, A.; Zarraga, G.; Tam, S.; et al. Dual Proteome-Scale Networks Reveal Cell-Specific Remodeling of the Human Interactome. *Cell* **2021**, *184*, 3022–3040.e28, doi:10.1016/j.cell.2021.04.011.
5. Luck, K.; Kim, D.-K.; Lambourne, L.; Spirohn, K.; Begg, B.E.; Bian, W.; Brignall, R.; Cafarelli, T.; Campos-Laborie, F.J.; Charloteaux, B.; et al. A Reference Map of the Human Binary Protein Interactome. *Nature* **2020**, *580*, 402–408, doi:10.1038/s41586-020-2188-x.
6. Chatrathi, H.E.; Collins, J.C.; Wolfe, L.A.; Markello, T.C.; Adams, D.R.; Gahl, W.A.; Werner, A.; Sharma, P. Novel *CUL3* Variant Causing Familial Hyperkalemic Hypertension Impairs Regulation and Function of Ubiquitin Ligase Activity. *Hypertension* **2022**, *79*, 60–75, doi:10.1161/HYPERTENSIONAHA.121.17624.
7. Pinkas, D.M.; Sanvitale, C.E.; Bufton, J.C.; Sorrell, F.J.; Solcan, N.; Chalk, R.; Douth, J.; Bullock, A.N. Structural Complexity in the KCTD Family of Cullin3-Dependent E3 Ubiquitin Ligases. *Biochem. J.* **2017**, *474*, 3747–3761, doi:10.1042/BCJ20170527.
8. Ji, A.X.; Chu, A.; Nielsen, T.K.; Benlekbir, S.; Rubinstein, J.L.; Privé, G.G. Structural Insights into KCTD Protein Assembly and Cullin3 Recognition. *J. Mol. Biol.* **2016**, *428*, 92–107, doi:10.1016/j.jmb.2015.08.019.
9. Rolland, T.; Taşan, M.; Charloteaux, B.; Pevzner, S.J.; Zhong, Q.; Sahni, N.; Yi, S.; Lemmens, I.; Fontanillo, C.; Mosca, R.; et al. A Proteome-Scale Map of the Human Interactome Network. *Cell* **2014**, *159*, 1212–1226, doi:10.1016/j.cell.2014.10.050.
10. Kato, K.; Miya, F.; Oka, Y.; Mizuno, S.; Saitoh, S. A Novel Missense Variant in *CUL3* Shows Altered Binding Ability to BTB-Adaptor Proteins Leading to Diverse Phenotypes of *CUL3*-Related Disorders. *J. Hum. Genet.* **2021**, *66*, 491–498, doi:10.1038/s10038-020-00868-9.
11. Young, B.D.; Sha, J.; Vashisht, A.A.; Wohlschlegel, J.A. Human Multisubunit E3 Ubiquitin Ligase Required for Heterotrimeric G-Protein  $\beta$ -Subunit Ubiquitination and Downstream Signaling. *J. Proteome Res.* **2021**, *20*, 4318–4330, doi:10.1021/acs.jproteome.1c00292.

12. Heride, C.; Rigden, D.J.; Bertsoulaki, E.; Cucchi, D.; De Smaele, E.; Clague, M.J.; Urbé, S. The Centrosomal Deubiquitylase USP21 Regulates Gli1 Transcriptional Activity and Stability. *J. Cell Sci.* **2016**, jcs.188516, doi:10.1242/jcs.188516.
13. Smaldone, G.; Pirone, L.; Balasco, N.; Di Gaetano, S.; Pedone, E.M.; Vitagliano, L. Cullin 3 Recognition Is Not a Universal Property among KCTD Proteins. *PLOS ONE* **2015**, *10*, e0126808, doi:10.1371/journal.pone.0126808.
14. Lange, S.; Perera, S.; Teh, P.; Chen, J. Obscurin and KCTD6 Regulate Cullin-Dependent Small Ankyrin-1 (sAnk1.5) Protein Turnover. *Mol. Biol. Cell* **2012**, *23*, 2490–2504, doi:10.1091/mbc.e12-01-0052.
15. Kim, E.-J.; Kim, S.-H.; Jin, X.; Jin, X.; Kim, H. KCTD2, an Adaptor of Cullin3 E3 Ubiquitin Ligase, Suppresses Gliomagenesis by Destabilizing c-Myc. *Cell Death Differ.* **2017**, *24*, 649–659, doi:10.1038/cdd.2016.151.
16. Balasco, N.; Pirone, L.; Smaldone, G.; Di Gaetano, S.; Esposito, L.; Pedone, E.M.; Vitagliano, L. Molecular Recognition of Cullin3 by KCTDs: Insights from Experimental and Computational Investigations. *Biochim. Biophys. Acta BBA - Proteins Proteomics* **2014**, *1844*, 1289–1298, doi:10.1016/j.bbapap.2014.04.006.
17. Bayón, Y.; Trinidad, A.G.; De La Puerta, M.L.; Del Carmen Rodríguez, M.; Bogetz, J.; Rojas, A.; De Pereda, J.M.; Rahmouni, S.; Williams, S.; Matsuzawa, S.; et al. KCTD5, a Putative Substrate Adaptor for Cullin3 Ubiquitin Ligases. *FEBS J.* **2008**, *275*, 3900–3910, doi:10.1111/j.1742-4658.2008.06537.x.
18. Cho, H.J.; Ryu, K.-J.; Baek, K.E.; Lim, J.; Kim, T.; Song, C.Y.; Yoo, J.; Lee, H.G. Cullin 3/KCTD5 Promotes the Ubiquitination of Rho Guanine Nucleotide Dissociation Inhibitor 1 and Regulates Its Stability. *J. Microbiol. Biotechnol.* **2020**, *30*, 1488–1494, doi:10.4014/jmb.2007.07033.
19. Kasahara, K.; Kawakami, Y.; Kiyono, T.; Yonemura, S.; Kawamura, Y.; Era, S.; Matsuzaki, F.; Goshima, N.; Inagaki, M. Ubiquitin-Proteasome System Controls Ciliogenesis at the Initial Step of Axoneme Extension. *Nat. Commun.* **2014**, *5*, 5081, doi:10.1038/ncomms6081.
20. Wang, Y.; Cao, X.; Liu, P.; Zeng, W.; Peng, R.; Shi, Q.; Feng, K.; Zhang, P.; Sun, H.; Wang, C.; et al. KCTD7 Mutations Impair the Trafficking of Lysosomal Enzymes through CLN5 Accumulation to Cause Neuronal Ceroid Lipofuscinoses. *Sci. Adv.* **2022**, *8*, eabm5578, doi:10.1126/sciadv.abm5578.
21. Staropoli, J.F.; Karaa, A.; Lim, E.T.; Kirby, A.; Elbalalesy, N.; Romansky, S.G.; Leydiker, K.B.; Coppel, S.H.; Barone, R.; Xin, W.; et al. A Homozygous Mutation in KCTD7 Links Neuronal Ceroid Lipofuscinosis to the Ubiquitin-Proteasome System. *Am. J. Hum. Genet.* **2012**, *91*, 202–208, doi:10.1016/j.ajhg.2012.05.023.
22. Metz, K.A.; Teng, X.; Coppens, I.; Lamb, H.M.; Wagner, B.E.; Rosenfeld, J.A.; Chen, X.; Zhang, Y.; Kim, H.J.; Meadow, M.E.; et al. KCTD7 Deficiency Defines a Distinct Neurodegenerative Disorder with a Conserved Autophagy-lysosome Defect. *Ann. Neurol.* **2018**, *84*, 766–780, doi:10.1002/ana.25351.



23. Wang, J.; Huo, K.; Ma, L.; Tang, L.; Li, D.; Huang, X.; Yuan, Y.; Li, C.; Wang, W.; Guan, W.; et al. Toward an Understanding of the Protein Interaction Network of the Human Liver. *Mol. Syst. Biol.* **2011**, *7*, 536, doi:10.1038/msb.2011.67.
24. Olma, M.H.; Roy, M.; Le Bihan, T.; Sumara, I.; Maerki, S.; Larsen, B.; Quadroni, M.; Peter, M.; Tyers, M.; Pintard, L. An Interaction Network of the Mammalian COP9 Signalosome Identifies Dda1 as a Core Subunit of Multiple Cul4-Based E3 Ligases. *J. Cell Sci.* **2009**, *122*, 1035–1044, doi:10.1242/jcs.043539.
25. Ren, K.; Yuan, J.; Yang, M.; Gao, X.; Ding, X.; Zhou, J.; Hu, X.; Cao, J.; Deng, X.; Xiang, S.; et al. KCTD10 Is Involved in the Cardiovascular System and Notch Signaling during Early Embryonic Development. *PLoS ONE* **2014**, *9*, e112275, doi:10.1371/journal.pone.0112275.
26. Dubiel, D.; Bintig, W.; Kähne, T.; Dubiel, W.; Naumann, M. Cul3 Neddylation Is Crucial for Gradual Lipid Droplet Formation during Adipogenesis. *Biochim. Biophys. Acta BBA - Mol. Cell Res.* **2017**, *1864*, 1405–1412, doi:10.1016/j.bbamcr.2017.05.009.
27. Nagai, T.; Mukoyama, S.; Kagiwada, H.; Goshima, N.; Mizuno, K. Cullin-3-KCTD10-Mediated CEP97 Degradation Promotes Primary Cilium Formation. *J. Cell Sci.* **2018**, jcs.219527, doi:10.1242/jcs.219527.
28. Chen, Y.; Yang, Z.; Meng, M.; Zhao, Y.; Dong, N.; Yan, H.; Liu, L.; Ding, M.; Peng, H.B.; Shao, F. Cullin Mediates Degradation of RhoA through Evolutionarily Conserved BTB Adaptors to Control Actin Cytoskeleton Structure and Cell Movement. *Mol. Cell* **2009**, *35*, 841–855, doi:10.1016/j.molcel.2009.09.004.
29. Ibeawuchi, S.-R.C.; Agbor, L.N.; Quelle, F.W.; Sigmund, C.D. Hypertension-Causing Mutations in Cullin3 Protein Impair RhoA Protein Ubiquitination and Augment the Association with Substrate Adaptors. *J. Biol. Chem.* **2015**, *290*, 19208–19217, doi:10.1074/jbc.M115.645358.
30. Hu, X.; Yan, F.; Wang, F.; Yang, Z.; Xiao, L.; Li, L.; Xiang, S.; Zhou, J.; Ding, X.; Zhang, J. TNFAIP1 Interacts with KCTD10 to Promote the Degradation of KCTD10 Proteins and Inhibit the Transcriptional Activities of NF- $\kappa$ B and AP-1. *Mol. Biol. Rep.* **2012**, *39*, 9911–9919, doi:10.1007/s11033-012-1858-7.
31. Jiang, W.; Wang, W.; Kong, Y.; Zheng, S. Structural Basis for the Ubiquitination of G Protein  $\beta\gamma$  Subunits by KCTD5/Cullin3 E3 Ligase. *Sci. Adv.* **2023**, *9*, eadg8369, doi:10.1126/sciadv.adg8369.
32. Esposito, L.; Balasco, N.; Vitagliano, L. AlphaFold Predictions Provide Insights into the Structural Features of the Functional Oligomers of All Members of the KCTD Family. *Int. J. Mol. Sci.* **2022**, *23*, 13346, doi:10.3390/ijms232113346.
33. Esposito, L.; Balasco, N.; Smaldone, G.; Berisio, R.; Ruggiero, A.; Vitagliano, L. AlphaFold-Predicted Structures of KCTD Proteins Unravel Previously Undetected Relationships among the Members of the Family. *Biomolecules* **2021**, *11*, 1862, doi:10.3390/biom11121862.
